# Supplementary material
Source: ML conference proceedings conference paper supplement (https://openreview.net/forum?id=kqkm9Xi2vd)

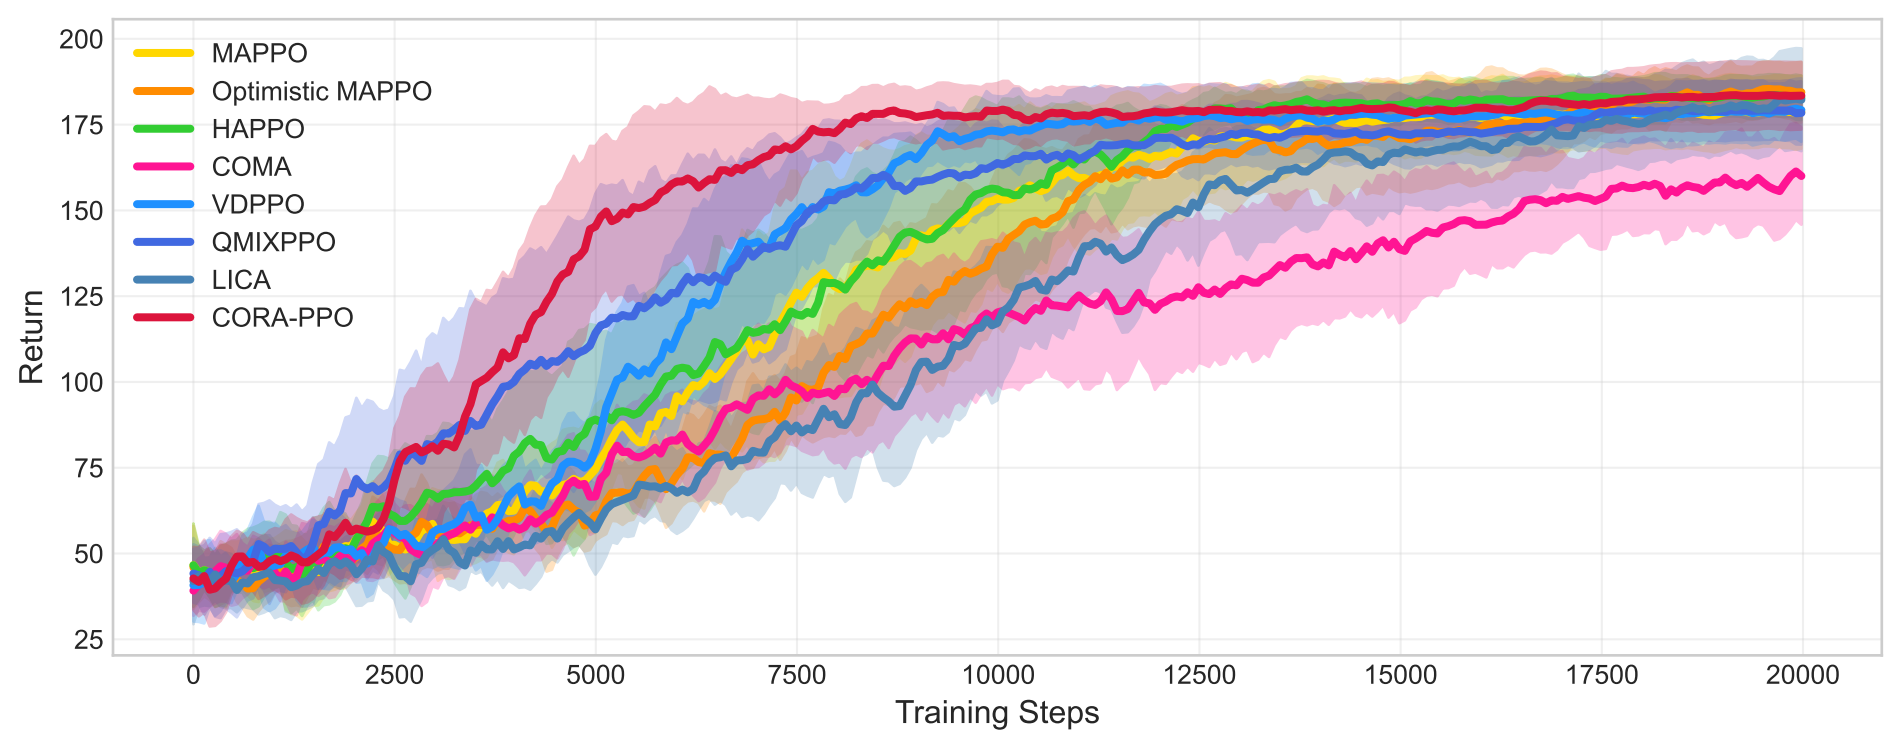

Supplement: supplementary_material [file matrix_game_matrix_game_comparison.pdf › Reproducibility Checklist and Code/Code/Discrete_MatrixGame_forSubmission/matrix_vis/matrix_game_matrix_game_comparison.pdf]

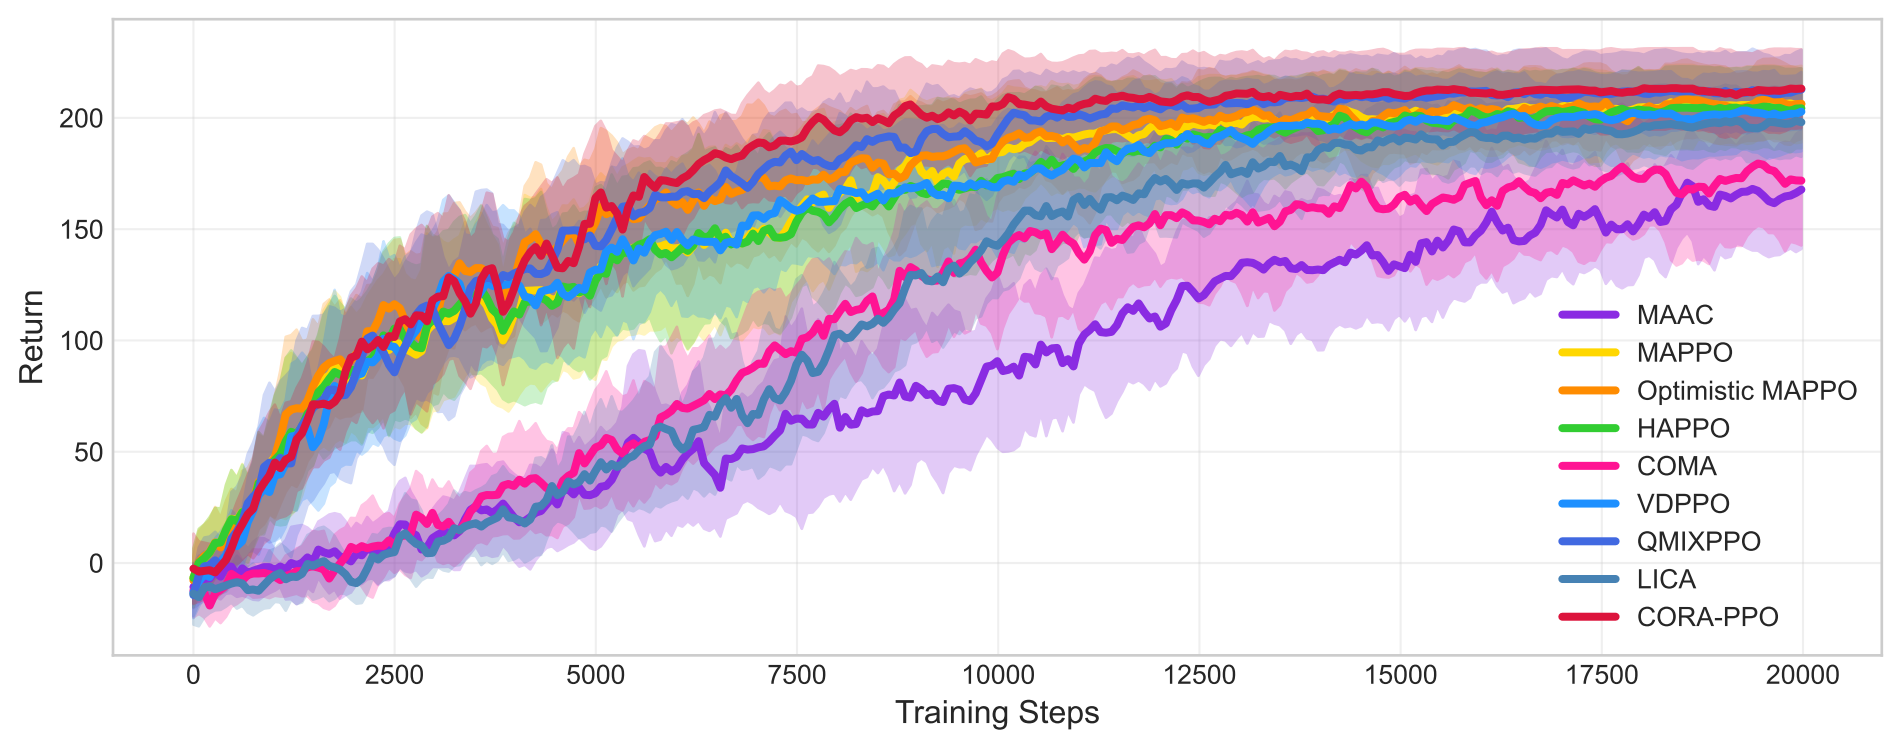

Supplement: supplementary_material [file matrix_game_matrix_game_multiopt_n_peaks=10_comparison.pdf › Reproducibility Checklist and Code/Code/Discrete_MatrixGame_forSubmission/matrix_vis/matrix_game_matrix_game_multiopt_n_peaks=10_comparison.pdf]

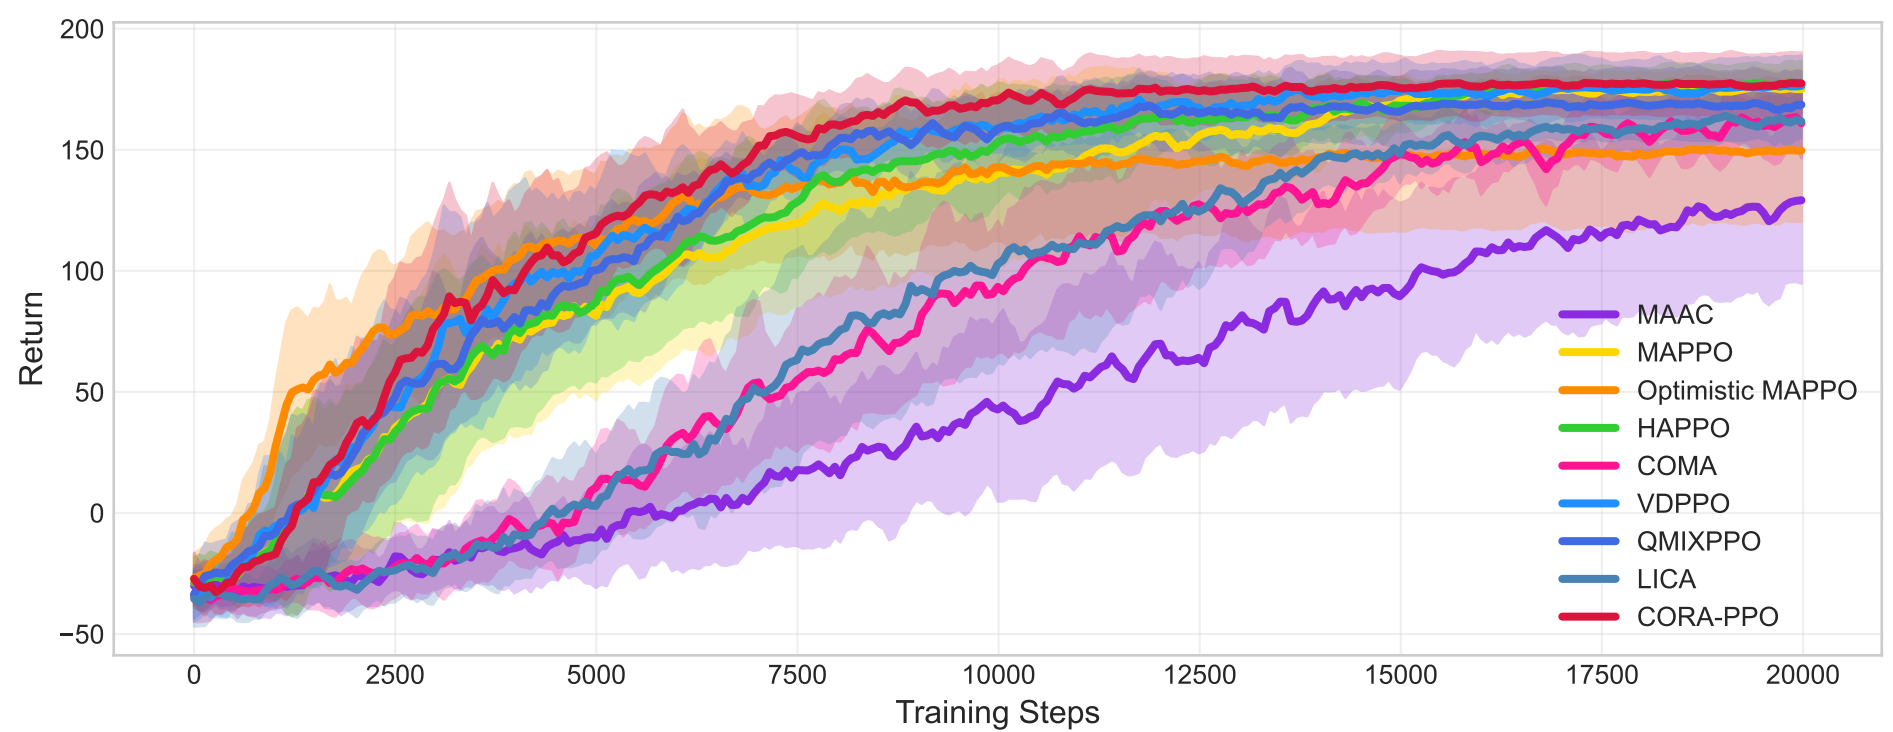

Supplement: supplementary_material [file matrix_game_matrix_game_multiopt_n_peaks=5_comparison.pdf › Reproducibility Checklist and Code/Code/Discrete_MatrixGame_forSubmission/matrix_vis/matrix_game_matrix_game_multiopt_n_peaks=5_comparison.pdf]

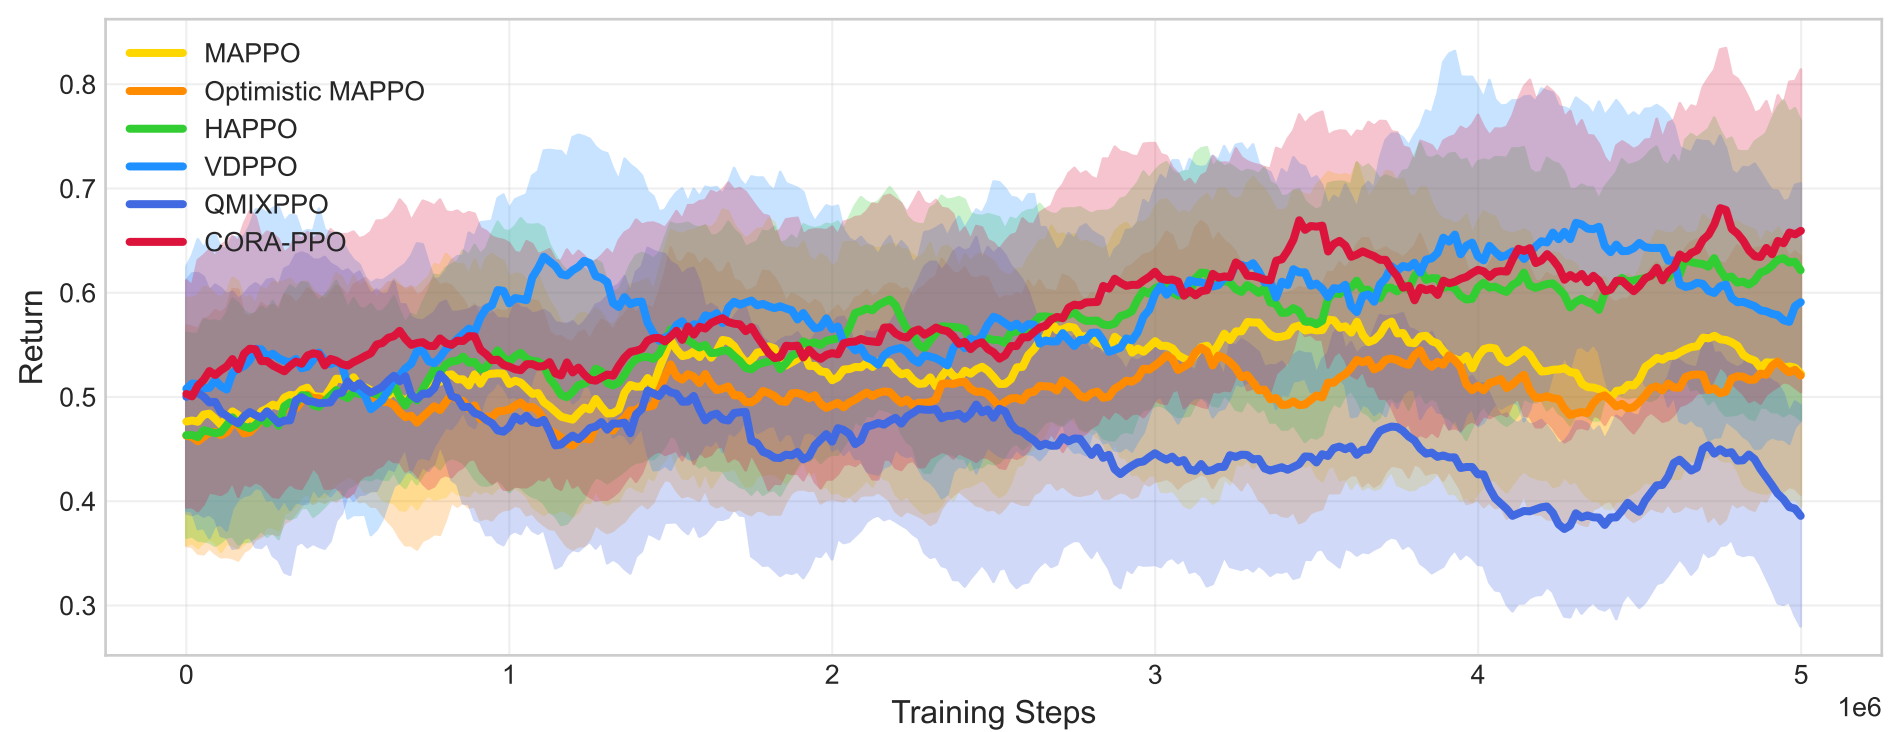

Supplement: supplementary_material [file VMAS_dispersion_comparison.pdf › Reproducibility Checklist and Code/Code/Discrete_VMAS_forSubmission/matrix_vis/VMAS_dispersion_comparison.pdf]

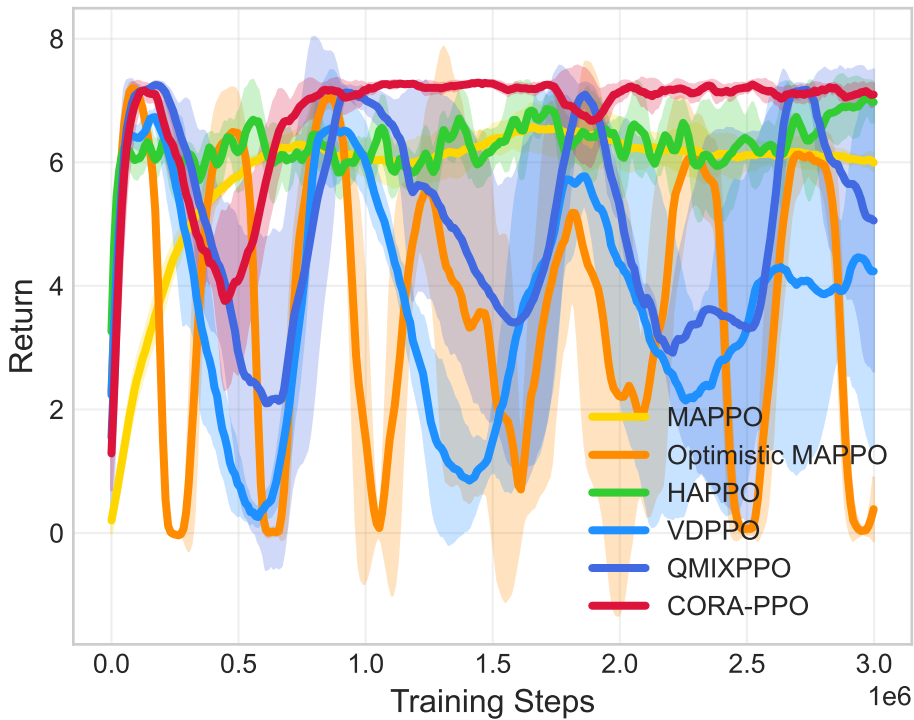

Supplement: supplementary_material [file VMAS_give_way_comparison.pdf › Reproducibility Checklist and Code/Code/Discrete_VMAS_forSubmission/matrix_vis/VMAS_give_way_comparison.pdf]

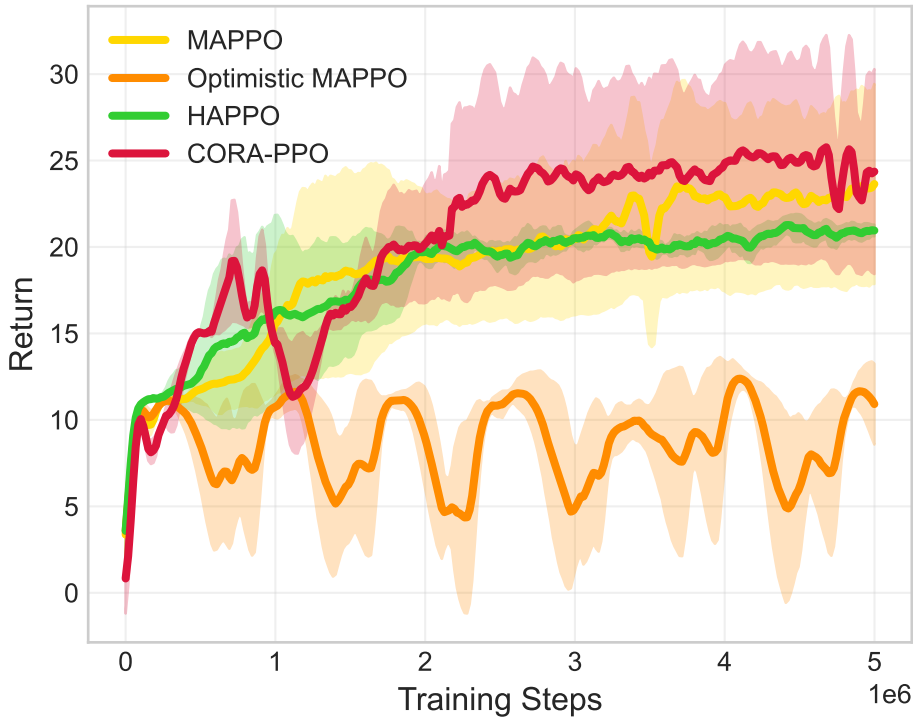

Supplement: supplementary_material [file VMAS_multi_give_way_comparison.pdf › Reproducibility Checklist and Code/Code/Discrete_VMAS_forSubmission/matrix_vis/VMAS_multi_give_way_comparison.pdf]

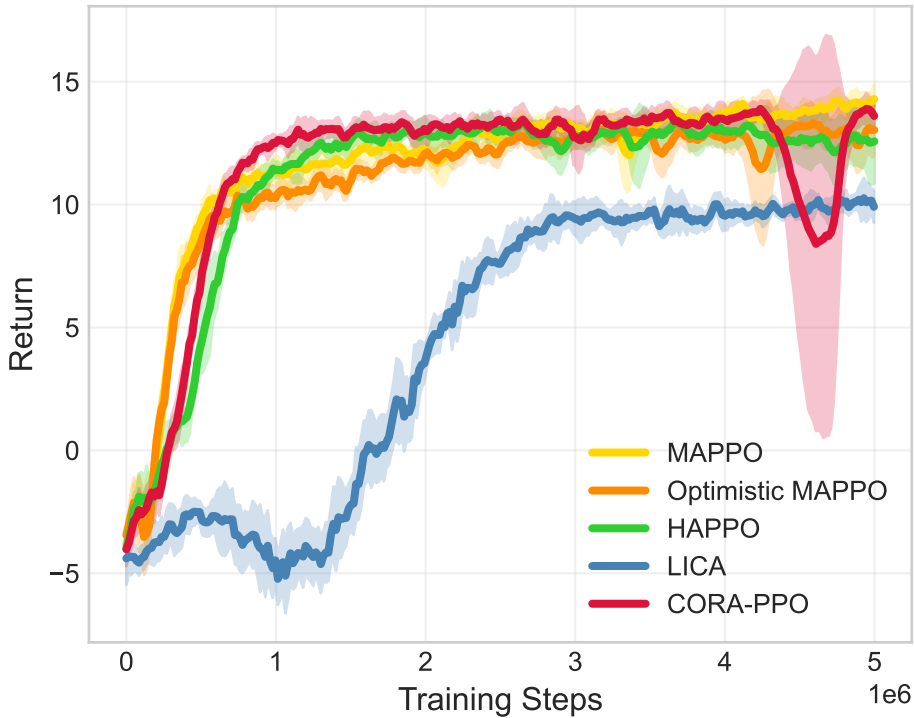

Supplement: supplementary_material [file VMAS_navigation_comparison.pdf › Reproducibility Checklist and Code/Code/Discrete_VMAS_forSubmission/matrix_vis/VMAS_navigation_comparison.pdf]
